# Supplementary material for: Nidogen‐1 Mitigates Ischemia and Promotes Tissue Survival and Regeneration
Source: PubMed Central journal article supplement (PMC7887579; doi:10.1002/advs.202002500), 2020-12-21
Supplement: ADVS-8-2002500-s001.pdf [file ADVS-8-2002500-s001.pdf]

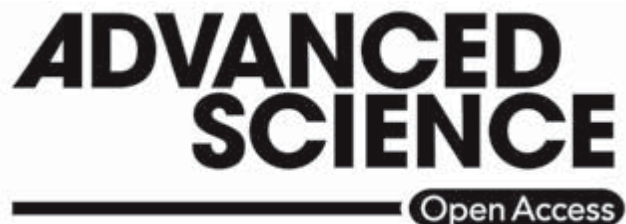

## Supporting Information

for *Adv. Sci.*, DOI: 10.1002/advs.202002500

### Nidogen-1 Mitigates Ischemia and Promotes Tissue Survival and Regeneration

*Aline Zbinden, Shannon L. Layland, Max Urbanczyk, Daniel A. Carvajal Berrio, Julia Marzi, Monika Zauner, Anne Hammerschmidt, Eva M. Brauchle, Katrin Sudrow, Simon Fink, Markus Templin, Simone Liebscher, Gerd Klein, Arjun Deb, Garry P. Duffy, Gay M. Crooks, Johannes A. Eble, Hanna K. A. Mikkola, Ali Nsair, Martina Seifert, and Katja Schenke-Layland\**

# Supporting Information

## Nidogen-1 Mitigates Ischemia and Promotes Tissue Survival and Regeneration

### Authors

Aline Zbinden<sup>1</sup>, Shannon L. Layland<sup>1</sup>, Max Urbanczyk<sup>1</sup>, Daniel A. Carvajal Berrio<sup>1,2</sup>, Julia Marzi<sup>1,3</sup>, Monika Zauner<sup>1</sup>, Anne Hammerschmidt<sup>1</sup>, Eva M. Brauchle<sup>1,2,3</sup>, Katrin Sudrow<sup>4,5</sup>, Simon Fink<sup>3</sup>, Markus Templin<sup>3</sup>, Simone Liebscher<sup>1</sup>, Gerd Klein<sup>6</sup>, Arjun Deb<sup>7,8,9,10,11</sup>, Garry P. Duffy<sup>12</sup>, Gay M. Crooks<sup>8,10,13</sup>, Johannes A. Eble<sup>14</sup>, Hanna K. A. Mikkola<sup>7,8,9,10</sup>, Ali Nsair<sup>8,11</sup>, Martina Seifert<sup>4,5</sup> and Katja Schenke-Layland<sup>1,2,3,11\*</sup>

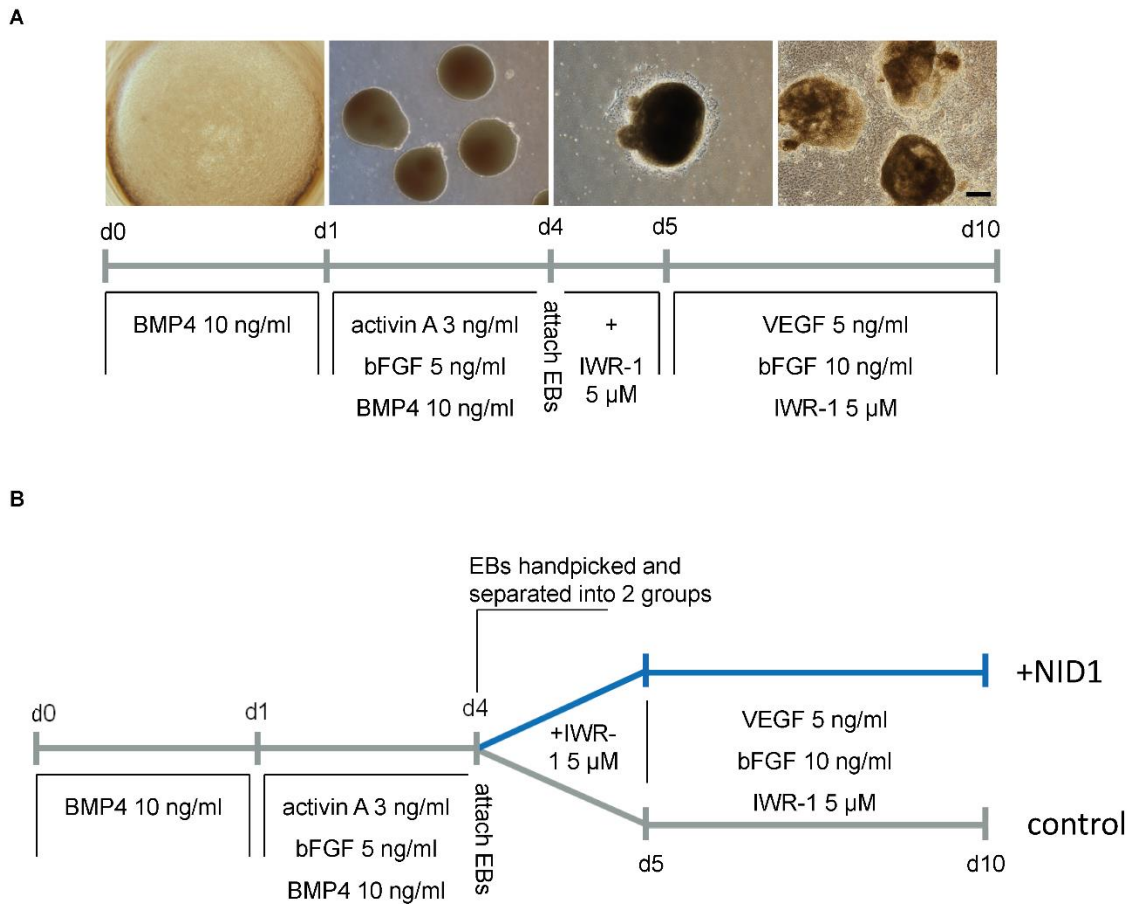

**Figure S1. Schematic illustration of the modified cardiovascular differentiation protocol.** EBs were derived from hESCs (line H9). **(A)** The differentiation protocol timeline is shown together with the stage-specific additives to the medium. Scale bar equals 100  $\mu\text{m}$ . **(B)** The differentiation protocol using NID1 from day 4 (d4) and control are shown together with the stage-specific additives in the medium.

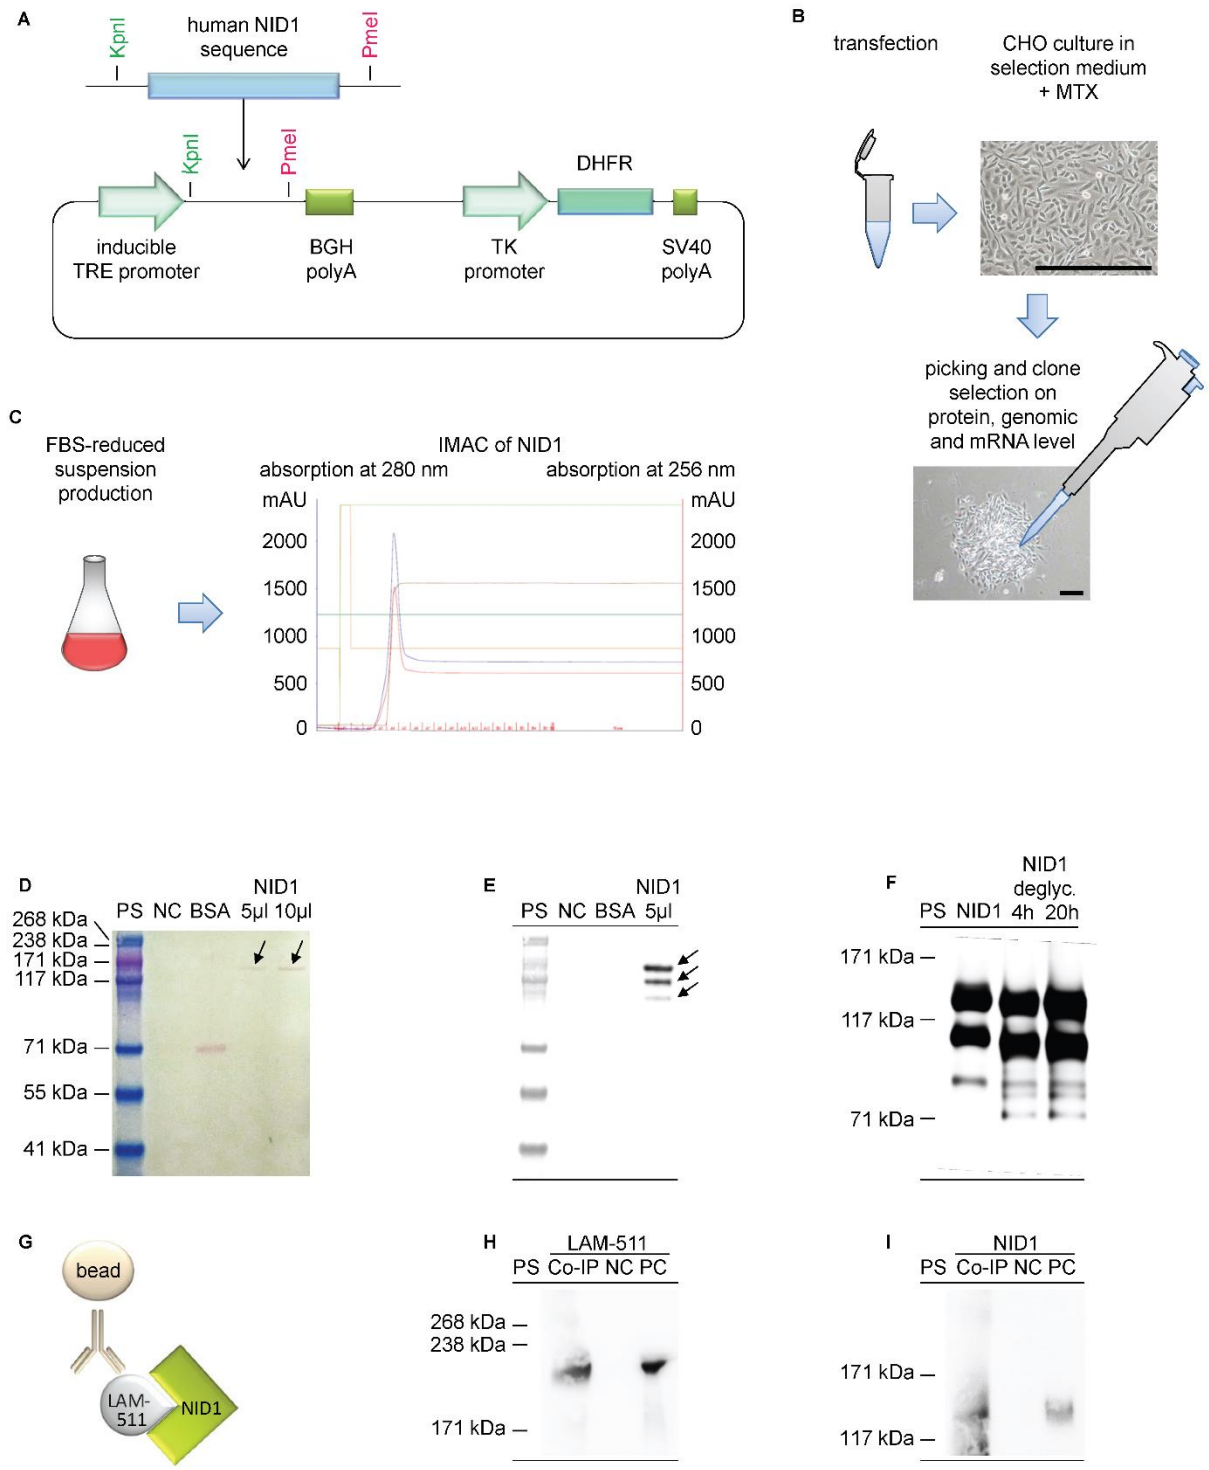

**Figure S2. Recombinant NID1 production and characterization.** (A) Schematic representation of NID1 production plasmid generation with main components for genomic amplification strategy. (B) Schematic depiction of CHO culture transfection with the NID1 production plasmid, MTX selection and clone analysis. Scale bars equal 200 µm. (C) Schematic depiction of production clone adaptation to FBS-reduced suspension culture and purification of secreted NID1 using immobilized-metal affinity chromatography (IMAC). Characteristic protein absorption is shown at 280 nm (blue line) and 256 nm (red line) in milli absorption unit (mAU). (D) Ponceau-Red staining of a nitrocellulose membrane with IMAC eluates: negative control (NC, 10 µl IMAC eluate of media with 1% FBS, dialyzed), BSA (10 µl IMAC eluate of media with 1% BSA) and 5

or 10  $\mu$ l IMAC eluate of NID1-containing cell culture media with originally 0.5% FBS, dialyzed. **(E)** Same membrane after discoloring and specific immunodetection of NID1. Arrows indicate 3 NID1 bands at about 140 kDa, 110 kDa and 90 kDa. **(F)** Specific immunodetection of NID1 deglycosylated for 4 hours and for 20 hours shows a shift of the characteristic NID1 bands to lower molecular weight compared to a NID1 control that was not treated with the deglycosylation enzyme, proving the glycosylated state of the recombinant NID1. **(G)** Schematic of Co-IP between interaction partners NID1 and LAM-511. **(H)** Specific immunodetection of the  $\beta$ 1 and  $\gamma$ 1 chain of LAM-511 in Co-IP, NC (Co-IP w/o LAM antibody) and positive control (PC, LAM-511). **(I)** Specific immunodetection of NID1 in Co-IP, NC (Co-IP w/o LAM antibody) and PC (NID1). The HiMark pre-stained protein standard (PS) was used in all blots.

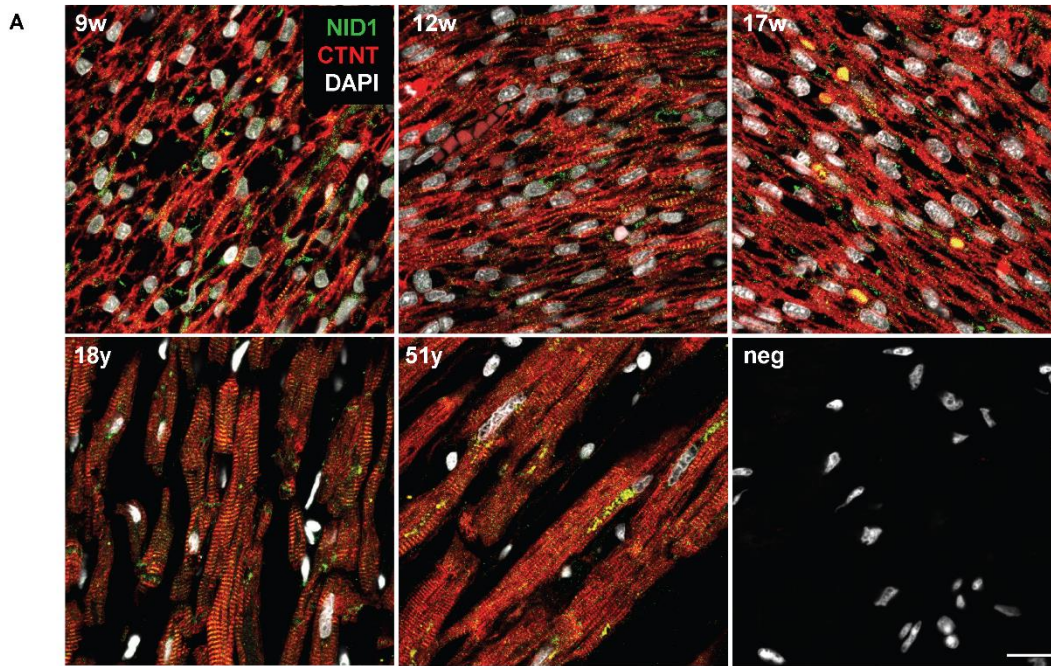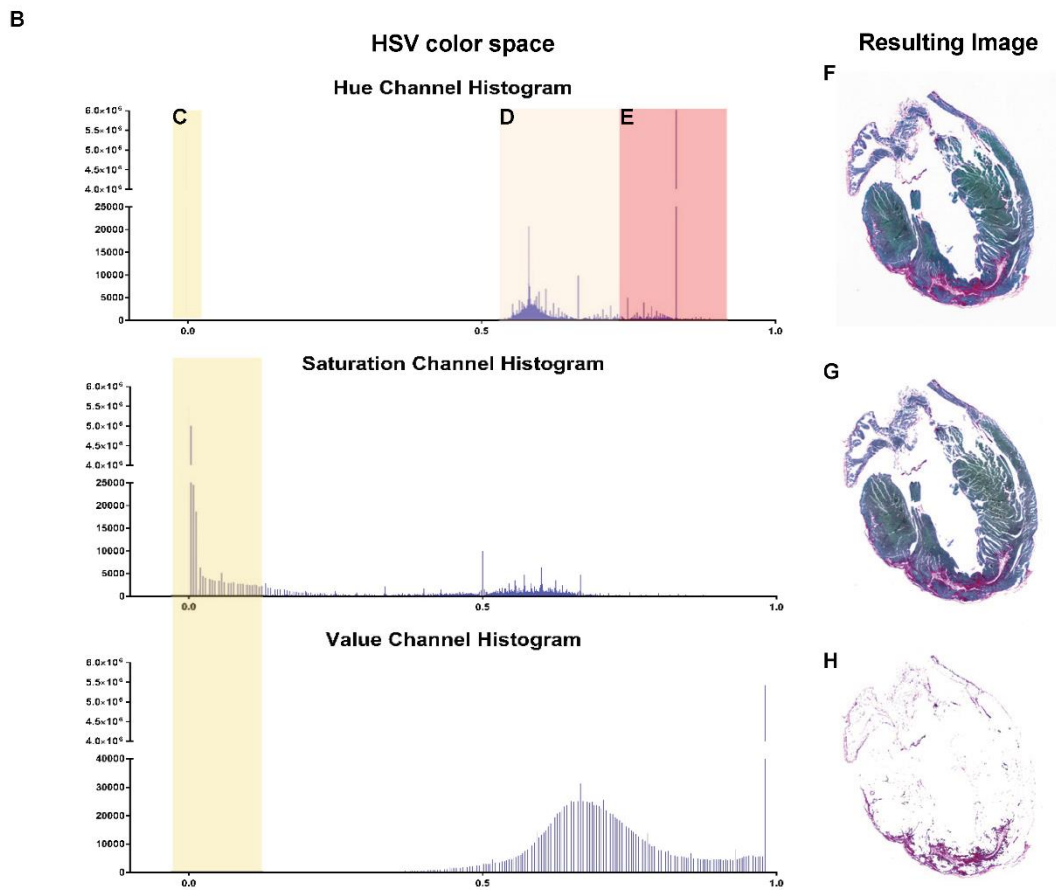

**Figure S3. Identification of NID1 as crucial ECM protein in fetal and adult hearts by IF staining & Myocardial scar quantification.** (A) NID1 (green) was detected in fetal heart sections 9, 12 and 17 weeks post-fertilization as well as in sections of 18 and 51 year old adult heart tissue. CTNT (red) was used to detect CMs. Cell nuclei were visualized with DAPI (white).

Scale bar equals 20  $\mu\text{m}$ . **(B-H)** HSV color segmentation was performed using a customized MATLAB code. The HSV histogram bands responsible for the background are shown in **(C)**, the Fast Green-positive region labeling the myocardium is shown in **(D)** and, the Picrosirius Red-stained areas corresponding to the scar content are shown in **(E)**. By subtracting band **(C)** from an image of Picrosirius Red and Fast Green **(F)**, an image without background is generated **(G)** and, comparably, the removal of bands **(C)** and **(D)** yields an image of only the scar component **(H)**.

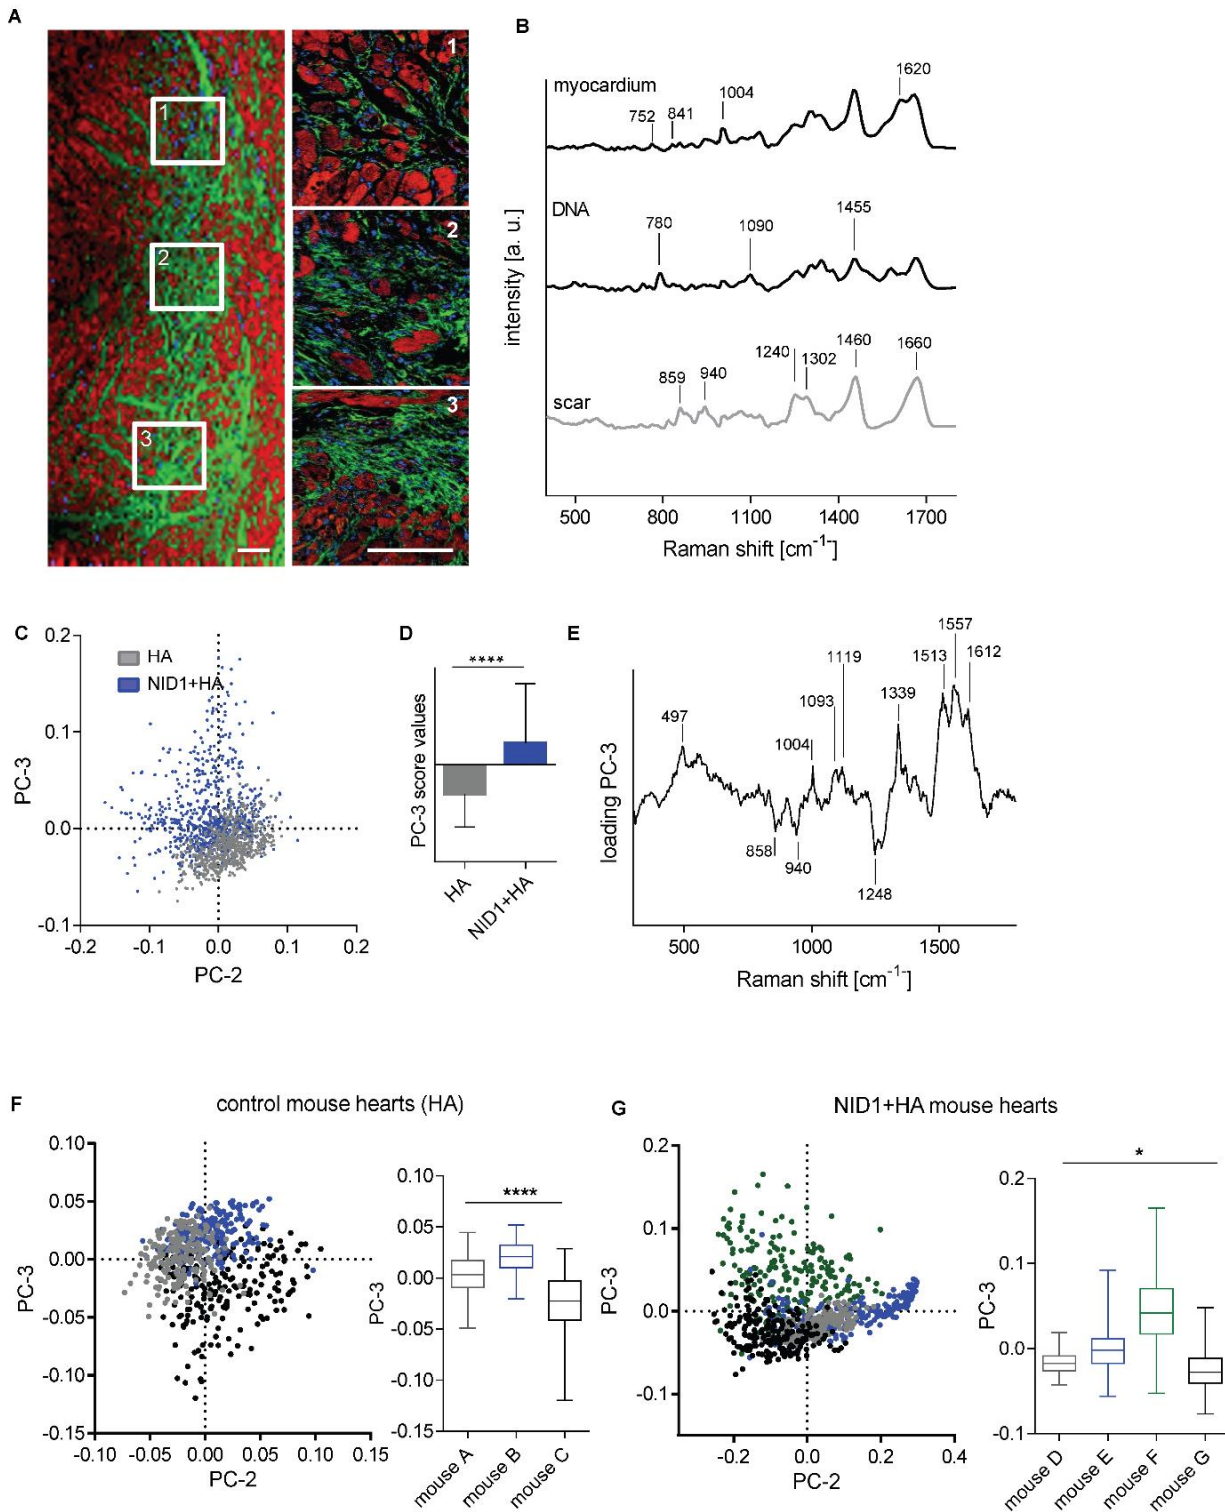

**Figure S4. Raman imaging and multivariate analysis of infarcted mouse hearts and single animals.** (A) Representative overview of Raman images showing DNA (blue), myocardium (red) and the scar (green). Three regions within the scar area (rectangular boxes: 1-3) were selected for high-resolution Raman images. (B) Spectra-associated to the color-coding shown in (A). Based on the signal patterns, the specific ECM composition for the scar area was detected. Scale bar equals 100  $\mu\text{m}$ . (C,D) PCA of Raman spectra revealed molecular and structural differences in the scar area of NID1+HA and control hearts. PC score values of spectra from NID1+HA and control

hearts were significantly different, unpaired t-test. **(E)** The loading plot displays typical porphyrin vibrations (1513, 1557, 1612  $\text{cm}^{-1}$ ) seen in the NID1+HA heart tissue. Collagen peaks (858 and 1248  $\text{cm}^{-1}$ ) were assigned to the control hearts. PCA of TCA scar component of **(F)** control (HA) and **(G)** NID1+HA mouse hearts. Significant differences between animals are detected in both groups. Kruskal-Wallis test with Dunn's multiple comparisons test. Results are shown as standard box plot diagram. \* $p < 0.05$ , \*\* $p < 0.01$ , \*\*\* $p < 0.001$  and \*\*\*\* $p < 0.0001$ .



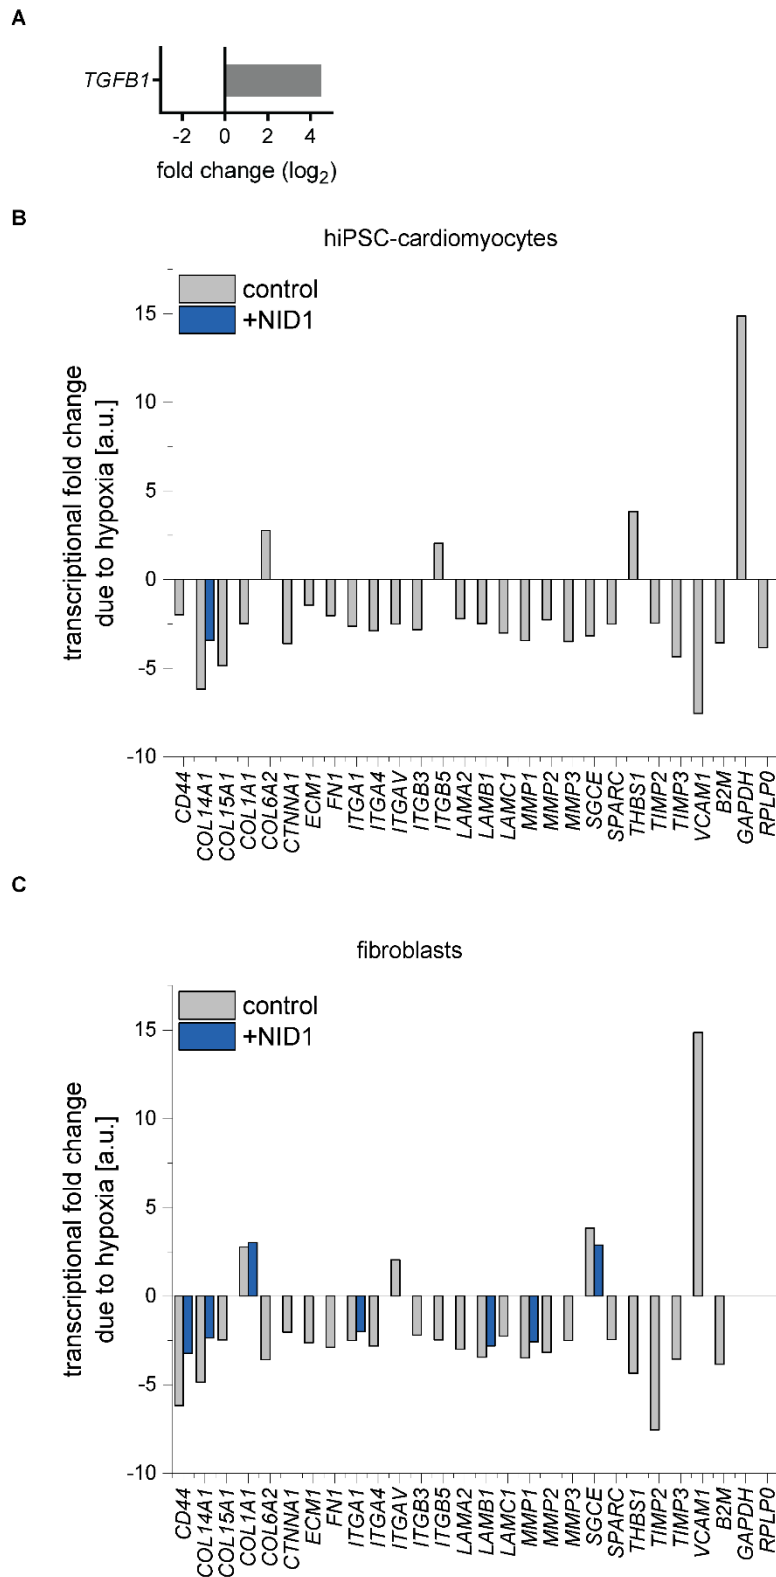

**Figure S5. Translational changes in ECM production, degradation and regulation due to hypoxic conditions.** (A) Transcriptional changes of *TGFBI* in NID1-treated hiPSC-CMs under normoxic conditions. (B,C) Transcriptional changes in gene expression after hypoxic conditions without (control) and with NID1 (B) hiPSC-CMs and (C) dermal fibroblasts. Gene regulation are shown when fold-regulation  $> |2|$ , p-value  $< 0.05$ .

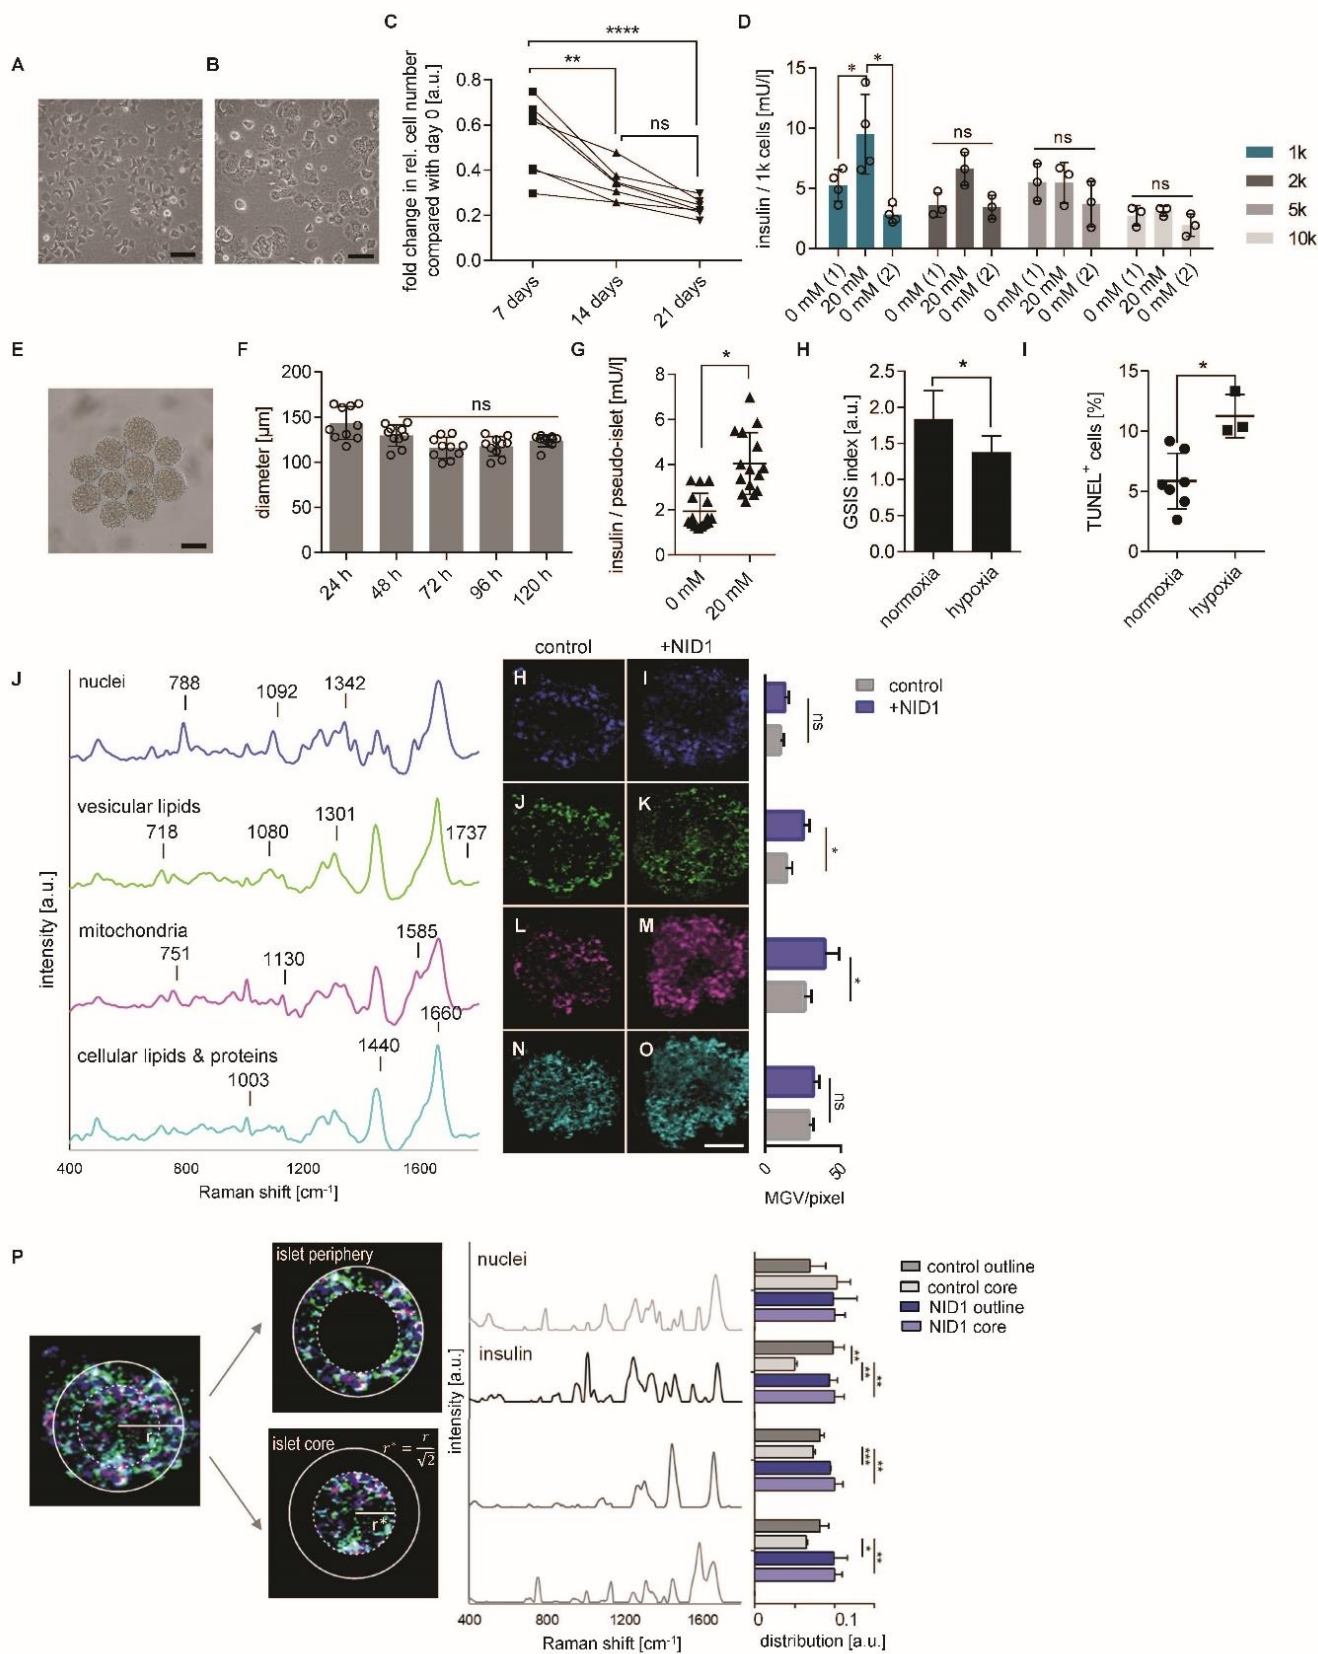

**Figure S6. Human pseudo-islet functionality under hypoxic conditions and characterization by in situ Raman imaging and multivariate analysis. (A)** Unexcised and **(B)** excised EndoC- $\beta$ H3 morphology. Scale bars equal 100  $\mu$ m. **(C)** Reduced cell number over time due to the excision of the proliferation transgene over 21 days. **(D)** GSIS assay (with 0 and 20 mM glucose) of pseudo-islets composed of 1000 (1k), 2000 (2k), 5000 (5k) and 10000 (10k) cells/ pseudo-islet

after 5 days of culture under normoxic conditions. **(E)** 1k pseudo-islet morphology. Scale bar equals 100  $\mu\text{m}$  **(F)** Pseudo-islet size, described as pseudo-islet diameter, is stable from 72h until 5 days under normoxic conditions (n = 10); one-way ANOVA, \*p<0.05. **(G)** GSIS assay (with 0 and 20 mM glucose) of pseudo-islets under normoxic conditions at 5 days (n = 15); unpaired t-test, \*p<0.05 **(H)** Significant loss of glucose responsiveness under hypoxic conditions, described as the GSIS index (fold increase in insulin release due to the transition from Krebs buffer (0 mM glucose) to 20 mM glucose (n = 10); one-way ANOVA, \*p<0.05. **(I)** DNA fragmentation under hypoxic conditions determined by the quantification of TUNEL<sup>+</sup> cells (n = 3-7); unpaired t-test. **(J)** True component analysis (TCA) identified four major spectral components assigned to nuclei (blue), insulin-transporting lipid vesicles (green), mitochondrial activity (pink) and cellular lipids and proteins (light blue). **(H-O)** False color intensity distribution images for each spectral component in **(H,J,L,N)** PBS controls and **(I,K,M,O)** NID1-treated pseudo-islets. Semi-quantitative analysis by definition of the mean gray value intensity/pixel demonstrated a significant increase in the vesicular lipids and the mitochondrial activity in NID1-treated islets. **(P)** Multivariate curve resolution (MCR) analysis was performed for in-depth analysis of the molecular composition in the periphery and core region of the hypoxic pseudo-islets. Most relevant, components related to nuclei, insulin, lipids and mitochondria were identified and their distribution within both regions were compared in PBS controls and NID1-treated pseudo-islets. The control core region showed a significant decrease in insulin, lipids and mitochondria, whereas the NID1-treated core region showed levels comparable to the peripheral regions (n = 4); \*p<0.05, \*\*p<0.01, \*\*\*p<0.001.

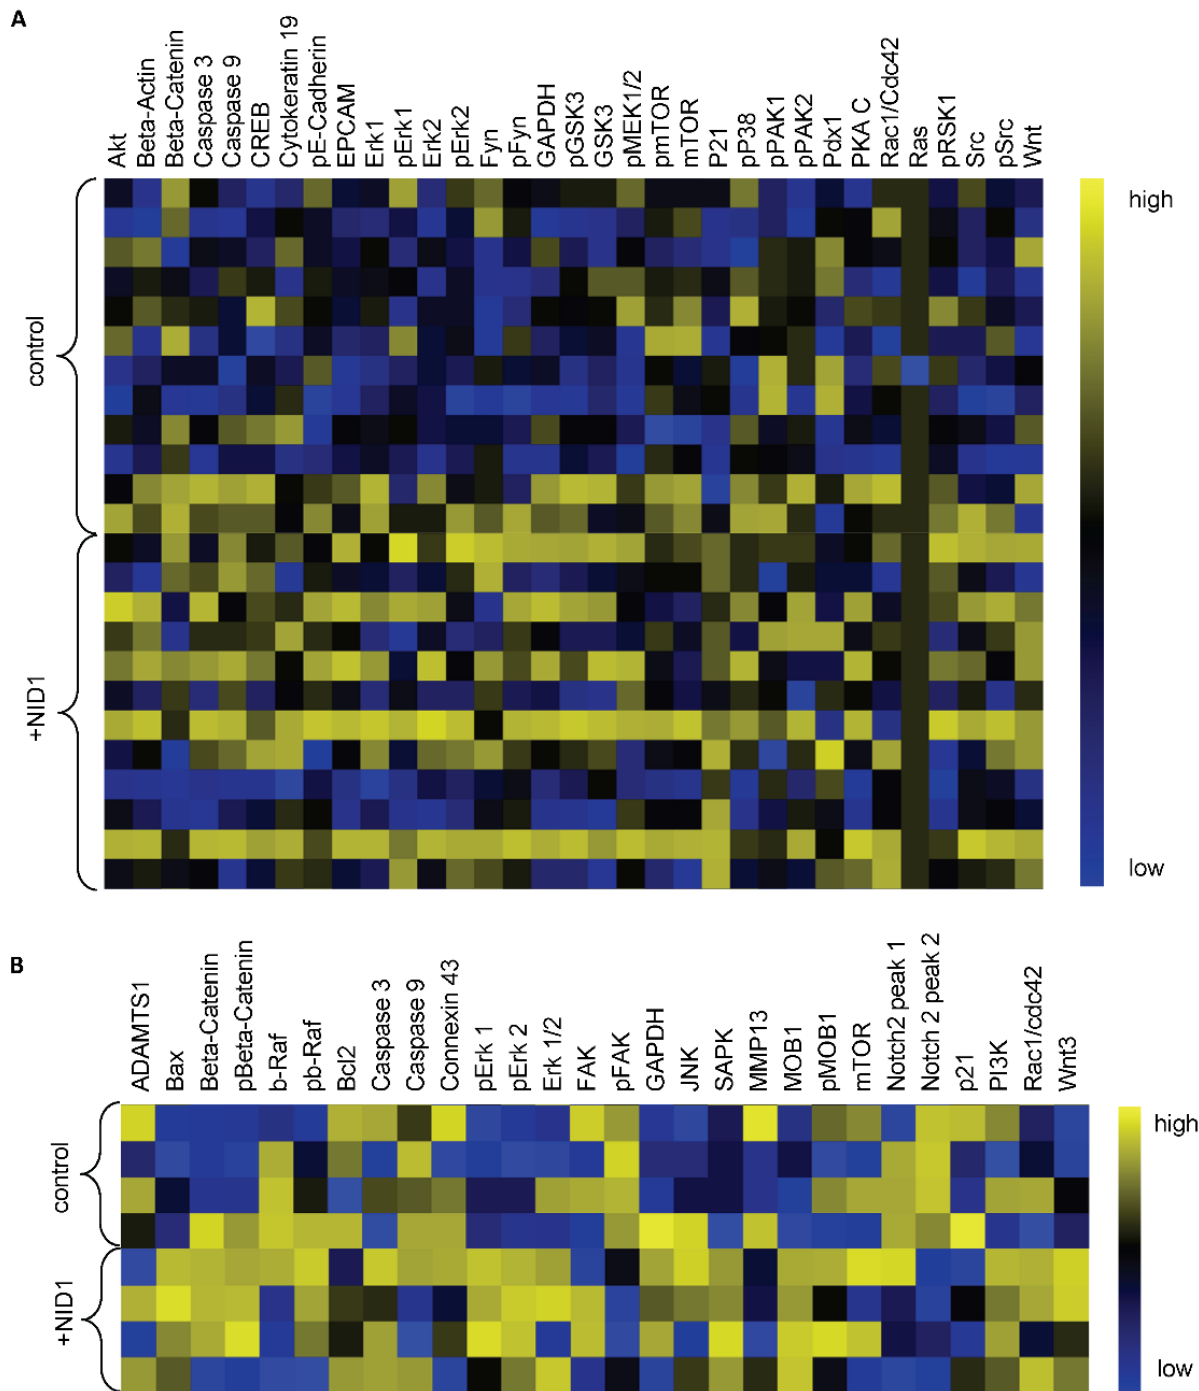

**Figure S7. Change in protein expression in NID1-treated cultures.** DigiWest<sup>®</sup>-based protein expression analysis of all tested proteins in (a) NID1-treated pseudo-islets (n = 12) and (b) NID1-treated hiPSC-CMs (n = 4) under hypoxic conditions compared with their respective controls. Data are shown as column-wise and color-coded heatmap from the lowest (blue) to the highest (yellow) expression for each analyte.

|                           | baseline     | saline         | HA               | NID1 + HA         |
|---------------------------|--------------|----------------|------------------|-------------------|
| Heart Rate <sup>min</sup> | 605 ± 46     | 675 ± 18       | 549 ± 46*        | 539 ± 45*         |
| LVIDd <sup>mm</sup>       | 2.65 ± 0.40  | 4.77 ± 0.36    | 3.40 ± 0.44**    | 2.90 ± 0.18***    |
| LVIDs <sup>mm</sup>       | 1.30 ± 0.22  | 4.29 ± 0.31    | 2.93 ± 0.51**    | 2.15 ± 0.18****#  |
| LVAWd <sup>mm</sup>       | 0.73 ± 0.10  | 0.49 ± 0.01    | 0.48 ± 0.05      | 0.51 ± 0.06       |
| LVAWs <sup>mm</sup>       | 1.12 ± 0.14  | 0.52 ± 0.03    | 0.49 ± 0.04      | 0.60 ± 0.10       |
| LVPWd <sup>mm</sup>       | 0.71 ± 0.03  | 0.61 ± 0.17    | 0.53 ± 0.11      | 0.61 ± 0.07       |
| LVPWs <sup>mm</sup>       | 0.98 ± 0.03  | 0.79 ± 0.17    | 0.58 ± 0.03      | 0.70 ± 0.08       |
| LVED <sup>mm</sup>        | 2.67 ± 0.31  | 4.82 ± 0.26    | 3.52 ± 0.42**    | 2.82 ± 0.21****   |
| LVES <sup>mm</sup>        | 1.27 ± 0.20  | 4.26 ± 0.30    | 3.04 ± 0.43**    | 2.22 ± 0.18****#  |
| EDV <sup>μL</sup>         | 26.89 ± 7.50 | 108.80 ± 13.57 | 52.39 ± 15.62*** | 30.30 ± 5.69****  |
| ESV <sup>μL</sup>         | 4.18 ± 1.49  | 81.83 ± 13.34  | 36.91 ± 13.01*** | 16.86 ± 3.57****  |
| EF%                       | 84.88 ± 3.08 | 24.96 ± 4.75   | 30.17 ± 4.31     | 44.63 ± 1.57***## |
| FS%                       | 52.56 ± 3.70 | 11.54 ± 2.34   | 13.80 ± 2.10     | 21.12 ± 0.78**,#  |

**Table S1. Echocardiography analysis 28 days after MI/R.** Baseline is the pre-MI/R measurement of the NID1+HA mice. Data are presented as means ± standard error of the mean (SEM). \*p<0.05, \*\*p<0.01, \*\*\*p<0.001, \*\*\*\*p<0.0001 saline vs. HA and NID1+HA, #p<0.05, ##p<0.01 HA vs. NID1+HA; individual one-way ANOVA with Tukey's multiple comparison test, baseline (n = 4), saline (n = 3), HA (n = 3), NID1+HA (n = 4). LVIDd: left ventricular internal dimension at end diastole, LVIDs: left ventricular internal dimension at end-systole, LVAWd: left ventricular anterior wall thickness in diastole, LVAWs: left ventricular anterior wall thickness in systole, LVPWd: left ventricular posterior wall dimensions in diastole, LVPWs: left ventricular posterior wall dimensions in systole, LVED: left ventricle end-diastolic diameter, LVES: left ventricle end-systolic diameter, EDV: end-diastolic volume, ESV: end-systolic volume, EF: ejection fraction, FS: fractional shortening.

| Raman shift [cm <sup>-1</sup> ] | Assignment                                                                         |
|---------------------------------|------------------------------------------------------------------------------------|
| 497                             | glycogen                                                                           |
| 718                             | C-N / nucleotide peak                                                              |
| 751                             | mitochondrial DNA                                                                  |
| 752                             | porphyrin                                                                          |
| 780                             | DNA                                                                                |
| 788                             | DNA                                                                                |
| 841                             | Polysaccharides                                                                    |
| 858-9                           | proline, hydroxyproline                                                            |
| 940                             | C-C backbone                                                                       |
| 1003                            | phenylalanine                                                                      |
| 1004                            | phenylalanine                                                                      |
| 1080                            | typical phospholipids                                                              |
| 1090-3                          | phosphodioxy / DNA                                                                 |
| 1119                            | C-C stretch in lipids                                                              |
| 1130                            | phospholipid structural changes / Mitochondrial activity                           |
| 1240                            | lipids                                                                             |
| 1247-8                          | collagens, amide III                                                               |
| 1301                            | lipids, fatty acids, triglycerides                                                 |
| 1302                            | collagens                                                                          |
| 1339                            | tryptophan, CH <sub>2</sub> , CH <sub>3</sub> wagging - bending in lipids/proteins |
| 1342                            | guanine (DNA/RNA)                                                                  |
| 1440                            | CH <sub>2</sub> , CH <sub>3</sub> deformation (lipids)                             |
| 1455                            | deoxyribose                                                                        |
| 1460                            | CH <sub>2</sub> , CH <sub>3</sub> deformation of lipids and collagen               |
| 1513                            | cytosine, porphyrin                                                                |
| 1557                            | porphyrin $\nu(\text{C}=\text{C})$                                                 |
| 1585                            | mitochondria /mitochondrial activity                                               |
| 1612                            | C=C stretching (ring)                                                              |
| 1620                            | porphyrin $\nu(\text{C}=\text{C})$                                                 |
| 1660                            | amide I                                                                            |
| 1737-8                          | lipids                                                                             |

**Table S2. Raman-associated peaks.** Raman peaks in cm<sup>-1</sup> and their assigned molecular structure.

| antibodies for DigiWest                      | species    | order information     |
|----------------------------------------------|------------|-----------------------|
| Beta-Actin                                   | rabbit IgG | A1978, Sigma          |
| ADAMTS1                                      | rabbit IgG | 12897, Cell Signaling |
| Akt                                          | rabbit IgG | 4685, Cell Signaling  |
| Bax                                          | rabbit IgG | 2772, Cell Signaling  |
| Bcl2                                         | rabbit IgG | 2872, Cell Signaling  |
| Beta-Catenin                                 | rabbit IgG | 8480, Cell Signaling  |
| Beta-Catenin                                 | rabbit IgG | 8814, Cell Signaling  |
| Beta-Catenin - phospho Ser552                | rabbit IgG | 9566, Cell Signaling  |
| β-Raf                                        | rabbit IgG | 07-583, Upstate       |
| α-Raf - phospho Ser445                       | rabbit IgG | 2696, Cell Signaling  |
| Caspase 3                                    | rabbit IgG | 9662, Cell Signaling  |
| Caspase 9                                    | mouse IgG1 | 9508, Cell Signaling  |
| Connexin 43                                  | rabbit IgG | 3512, Cell Signaling  |
| CREB - phospho Ser133                        | rabbit IgG | 9198, Cell Signaling  |
| EpCAM                                        | rabbit IgG | 3599, Cell Signaling  |
| Erk1/2 (MAPK p44/42)                         | rabbit IgG | 4695, Cell Signaling  |
| Erk1/2 (MAPK p44/42) - phospho Thr202/Tyr204 | rabbit IgG | 4370, Cell Signaling  |
| E-cadherin                                   | rat IgG    | sc-59778, Santa Cruz  |
| E-cadherin – phospho Ser838/Ser840           | rabbit IgG | 2239-1, Epitomics     |
| FAK1                                         | rabbit IgG | 3285, Cell Signaling  |
| FAK1 - phospho Tyr397                        | rabbit IgG | 8556, Cell Signaling  |
| Fyn                                          | rabbit IgG | 4023, Cell Signaling  |
| Fyn – phospho Tyr530                         | rabbit IgG | orb99261, biorbyt     |
| GAPDH                                        | rabbit IgG | 5174, Cell Signaling  |
| GSK3 alpha/beta - phospho Ser21/Ser9         | rabbit IgG | 9331, Cell Signaling  |
| GSK3 beta                                    | rabbit IgG | 9315, Cell Signaling  |
| GSK3 beta - phospho Ser9                     | rabbit IgG | 9336, Cell Signaling  |
| JNK/SAPK                                     | rabbit IgG | 9252, Cell Signaling  |
| MEK1/2 - phospho Ser217/Ser221               | rabbit IgG | 9154, Cell Signaling  |
| MMP13                                        | mouse IgG1 | MAB511, R&D Systems   |
| MOB1                                         | rabbit IgG | 3863, Cell Signaling  |
| MOB1 - phospho Thr35                         | rabbit IgG | 8699, Cell Signaling  |
| mTOR (FRAP)                                  | rabbit IgG | 2983, Cell Signaling  |
| mTOR (FRAP)- phospho Ser2448                 | rabbit IgG | 2971, Cell Signaling  |
| Notch 2                                      | rabbit IgG | 5732, Cell Signaling  |
| P21                                          | rabbit IgG | 2947, Cell Signaling  |
| P38 MAPK - phospho Thr180/Tyr182             | rabbit IgG | 4511, Cell Signaling  |
| PAK 1/2 - phospho Ser144/Ser141              | rabbit IgG | 2606, Cell Signaling  |
| Pdx1                                         | rabbit IgG | 5679, Cell Signaling  |
| PI3-kinase p85 alpha                         | rabbit IgG | ab40755, abcam        |
| PKA C alpha                                  | rabbit IgG | 4782, Cell Signaling  |
| Rac1/Cdc42                                   | rabbit IgG | 4651, Cell Signaling  |
| Ras                                          | rabbit IgG | 8955, Cell Signaling  |
| RSK 1 (p90RSK) - phospho Thr573              | rabbit IgG | ab62324, abcam        |
| Src                                          | rabbit IgG | 2108, Cell Signaling  |
| Src – phospho Tyr527                         | rabbit IgG | 2105, Cell Signaling  |
| Wnt3A                                        | rabbit IgG | 09-162, Millipore     |
| antibodies for DigiWest                      | species    | order information     |
| dk-α-rb IgG (H+L) - RPE                      |            | #711-116-152, Jackson |
| dk-α-ms IgG (H+L) - RPE                      |            | #715-116-151, Jackson |
| gt-α-r IgG (H+L) - RPE                       |            | #112-116-143, Jackson |
| Streptavidin - RPE                           |            | #016-110-084, Jackson |

| antibodies for IF    | species        | dilution | order information                          |
|----------------------|----------------|----------|--------------------------------------------|
| <b>staining</b>      |                |          |                                            |
| NID1                 | rabbit IgG     | 1:100    | Sc-33141, Santa Cruz                       |
| NID1                 | rabbit IgG     | 1:1000   | kind gift from F. Zaucke                   |
| NID2                 | rabbit IgG     | 1:1000   | kind gift from F. Zaucke                   |
| FN                   | rabbit IgG     | 1:500    | A0245, Dako                                |
| POSTN                | rabbit IgG     | 1:100    | HPA012306, Sigma-Aldrich                   |
| LAM                  | rabbit IgG     | 1:50     | ab11575, Abcam                             |
| COL4                 | rabbit IgG     | 1:250    | ab6586, Abcam                              |
| COL1                 | rabbit IgG     | 1:75     | R1038, Acris                               |
| αSMA-FITC            | mouse IgG2a    | 1:500    | F3777, Sigma-Aldrich                       |
| CD31                 | rat IgG2a      | 1:20     | DIA-310, Dianova                           |
| MF20                 | mouse IgG2b    | 1:50     | MF20, Developmental Studies Hybridoma Bank |
| CTNT                 | rabbit IgG     | 1:3000   | HPA015774, Sigma-Aldrich                   |
| CTNT                 | mouse IgG1     | 1:600    | NB200-412, Novus Biologicals               |
| TUJ1                 | rabbit IgG     | 1:2000   | 802001, BioLegend                          |
| NESTIN               | rabbit IgG     | 1:200    | 839801, BioLegend                          |
| MAP2                 | rabbit IgG     | 1:500    | ab5622, Merck-Millipore                    |
| INS                  | guinea-pig IgG | 1:200    | A0564, Dako                                |
| E-cadherin           | mouse IgG2a    | 1:250    | ab76055, Abcam                             |
| CASP-3               | rabbit IgG     | 1:100    | ab13847, Abcam                             |
| rabbit IgG-AF488     | goat           | 1:250    | A-11034, Invitrogen                        |
| rat IgG2a-AF647      | goat           | 1:250    | A-21247, Invitrogen                        |
| mouse IgG1-AF594     | goat           | 1:250    | A-21125, Invitrogen                        |
| mouse IgG2a-AF488    | goat           | 1:250    | A-21131, Invitrogen                        |
| mouse IgG2b-AF594    | goat           | 1:250    | A-21145, Invitrogen                        |
| guinea-pig IgG-AF594 | goat           | 1:250    | A-11076, Invitrogen                        |
| antibodies for WB    | species        | dilution | order information                          |
| NID1                 | rabbit IgG     | 1:400    | sc-33141, Santa Cruz                       |
| LAM                  | Rabbit IgG     | 1:500    | ab11575, Abcam                             |
| anti-rabbit IgG-HRP  | goat           | 1:4000   | ab6721, Abcam                              |

| Primer                              | Sequence                                  |                                                                 |
|-------------------------------------|-------------------------------------------|-----------------------------------------------------------------|
| Human NID1 5'                       | QhNID1-389F<br>QhNID1-495R                | CCGCTGAGTCGCTGCACAGA<br>GTCCCGAGAAGGGCCCTGGT                    |
| Human NID1 3'                       | QhNID1-2015F<br>QhNID1-2160R              | CCACGGCTGGGATACCAACGCCCG<br>CC<br>CAGGATGTGCTCTCTCTCGTGCTG<br>G |
| Hamster B-Actin                     | QhamB-Actin-F<br>QhamB-Actin-R            | GGCGCTTTTGACTCAGGACTTTTA<br>GGGATGTTTGCTCCAACCGA                |
| Hamster p53                         | Qham-p53-F<br>Qham-p53-R                  | CATGCCGAATACCTGGATGACAAG<br>GCAAAATCAAACCTGTCTTCAACC            |
| human αSMA                          | Hs_ACTA2_1_SG                             | Qiagen, QT00088102                                              |
| human GAPDH                         | Hs_GAPDH_2_SG                             | Qiagen, QT01192646                                              |
| RT <sup>2</sup> Profiler PCR Arrays | Extracellular Matrix & Adhesion Molecules | Qiagen, PAHS-013Z                                               |

**Table S3. List of antibodies and primer sequences.**
